# Supplementary material for: Thermal Degradation of Vegetable Oils
Source: MDPI journal article supplement (doi:10.3390/foods12091839), 2023-04-28
Supplement: s1 [file s1]

## Supplementary Material

### Thermal Degradation of Vegetable Oils

Yi-Hsiou Tsai<sup>1</sup>, Donyau Chiang<sup>2</sup>, Yu-Ting Li<sup>2</sup>, Tsong-Pyng Perng<sup>1</sup>, Sanboh Lee<sup>1\*</sup>

<sup>1</sup> Department of Materials Science and Engineering, National Tsing Hua University, Hsinchu  
300, Taiwan

<sup>2</sup> Taiwan Instrument Research Institute, National Applied Research Laboratories, Hsinchu  
300, Taiwan

#### Figure Captions

Figure S1. The variations of UV-Vis transmittance versus wavelength for oils annealed for different times at temperatures: (a) 200°C, (b) 160°C, and (c) 140°C

Figure S2. The variations of UV-Vis transmittance versus wavelength for canola oils annealed for different times at temperatures: (a) 200°C, (b) 180°C, (c) 160°C, and (d) 140°C

Figure S3. The variations of UV-Vis transmittance versus wavelength for sunflower oils annealed for different times at temperatures: (a) 200°C, (b) 180°C, (c) 160°C, and (d) 140°C.

Figure S4. The variations of UV-Vis transmittance versus wavelength for mixed oils annealed for different times at temperatures: (a) 200°C, (b) 160°C, and (c) 140°C

Figure S5. The variations of cutoff wavelength with annealing time at different annealing temperatures for (a) soybean oil, (b) canola oil, and (c) olive oil.

Figure S6. The variations of absorbance with time at different annealing temperatures: (a) soybean oil, (b) olive oil, and (c) sunflower oil.

Figure S7. The variations of dynamic viscosity with annealing time at different annealing temperatures: (a) canola oil, (b) olive oil, and (c) sunflower oil.

Figure S8. The variations of electrical impedance with the frequency for (a) soybean oil, (b) canola oil, and (c) olive oil annealed at 200°C for different annealing times.

Figure S9. The variations of electrical impedance with the frequency for (a) soybean oil, (b) canola oil, (c) olive oil, and (d) sunflower oil annealed at 160°C for different annealing times.

Figure S10. The variations of impedance with annealing time for the four types of oils at frequency 1000 Hz and annealing temperatures: (a) 180°C, (b) 160°C, and (c) 140°C, respectively.

Figure S11. The variations of acid value with annealing time for all oils annealed at temperatures : (a) 180°C, (b) 160°C, and (c) 140°C, respectively.

---

\* Corresponding author e-mail: sbLee@mx.nthu.edu.tw

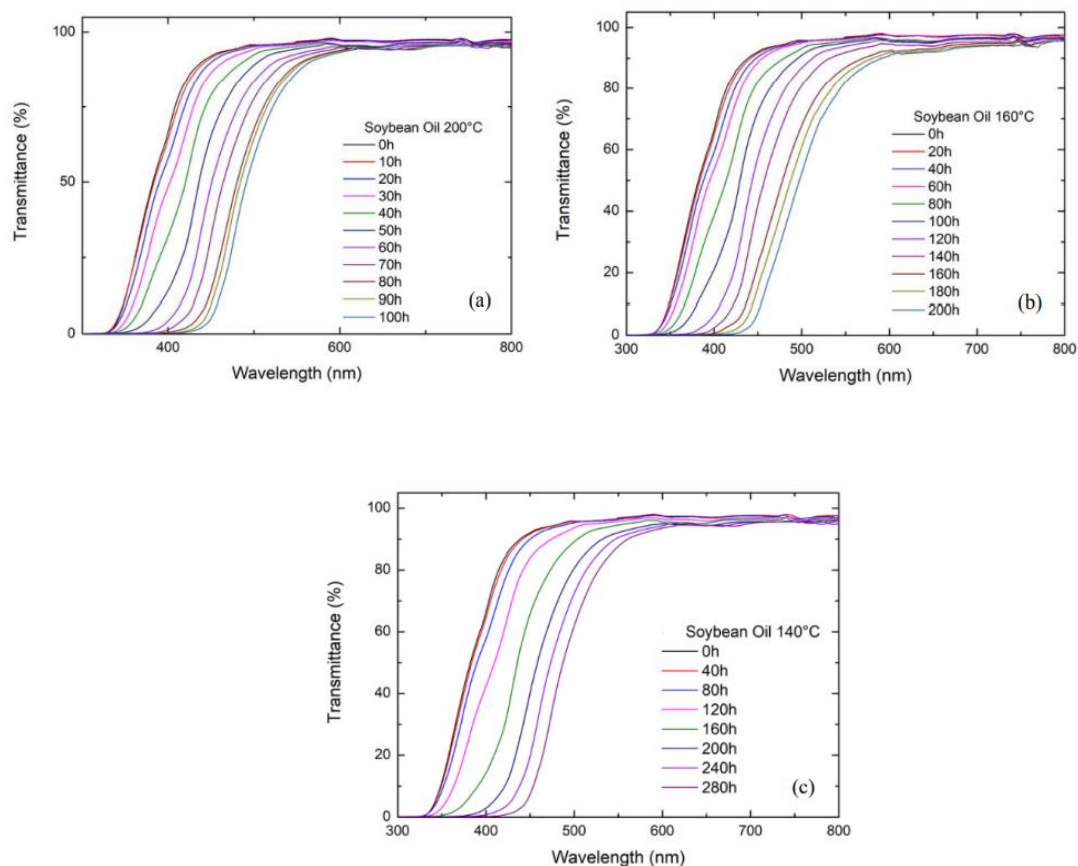

**Figure S1.** The variations of UV-Vis transmittance versus wavelength for soybean oils annealed for different times at temperatures: (a) 200°C, (b) 160°C, and (c) 140°C.

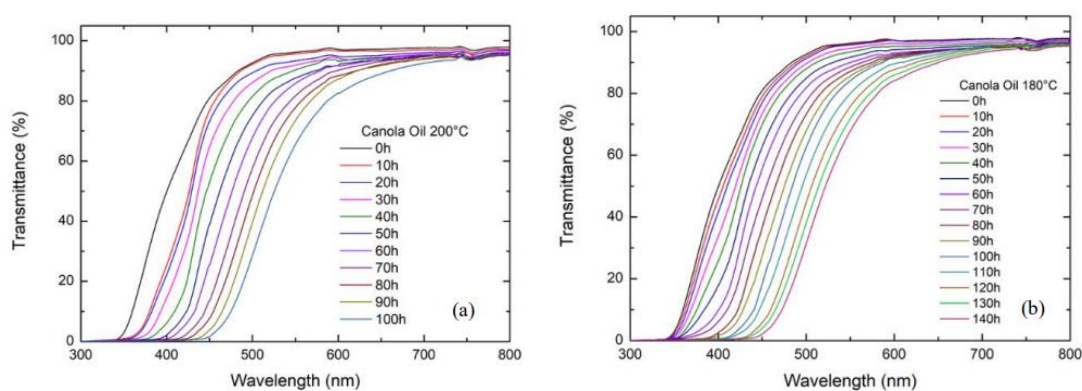

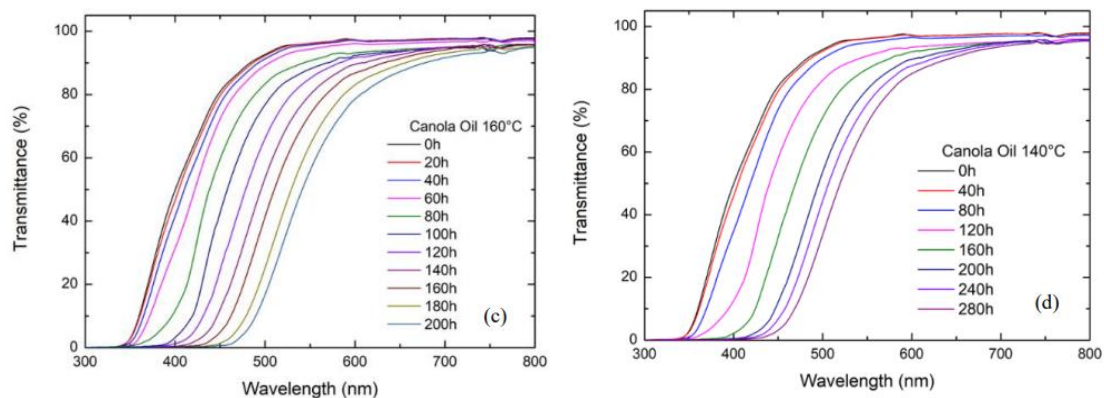

**Figure S2.** The variations of UV-Vis transmittance versus wavelength for canola oils annealed for different times at temperatures: (a) 200°C, (b) 180°C, (c) 160°C, and (d) 140°C

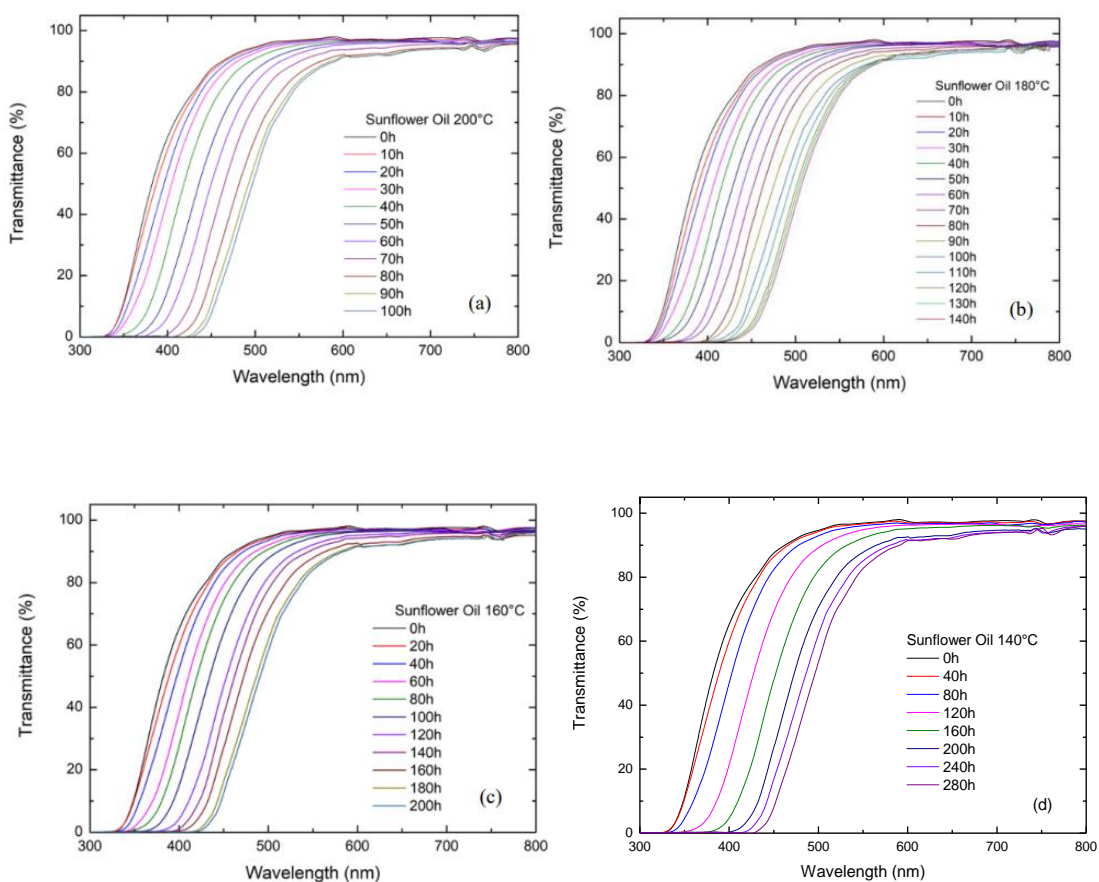

**Figure S3.** The variations of UV-Vis transmittance versus wavelength for sunflower oils annealed for different times at temperatures: (a) 200°C, (b) 180°C, (c) 160°C, and (d) 140°C.

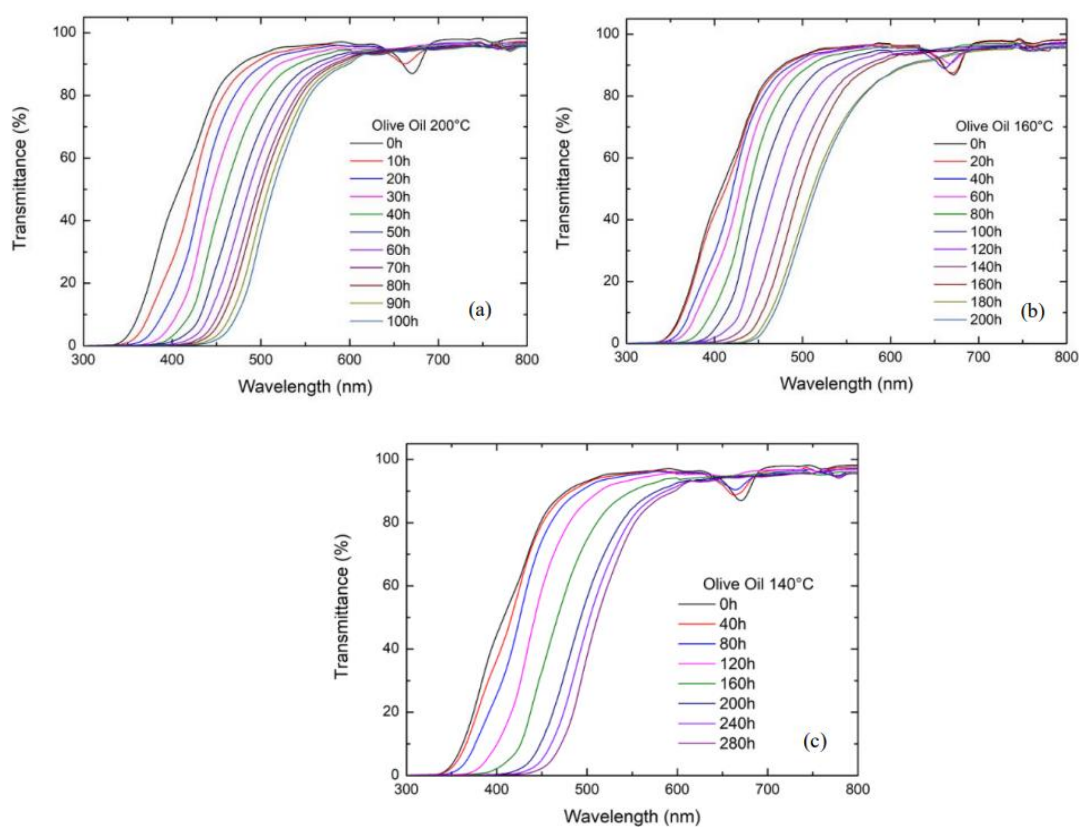

**Figure S4.** The variations of UV-Vis transmittance versus wavelength for olive oils annealed for different times at temperatures: (a) 200°C, (b) 160°C, and (c) 140°C

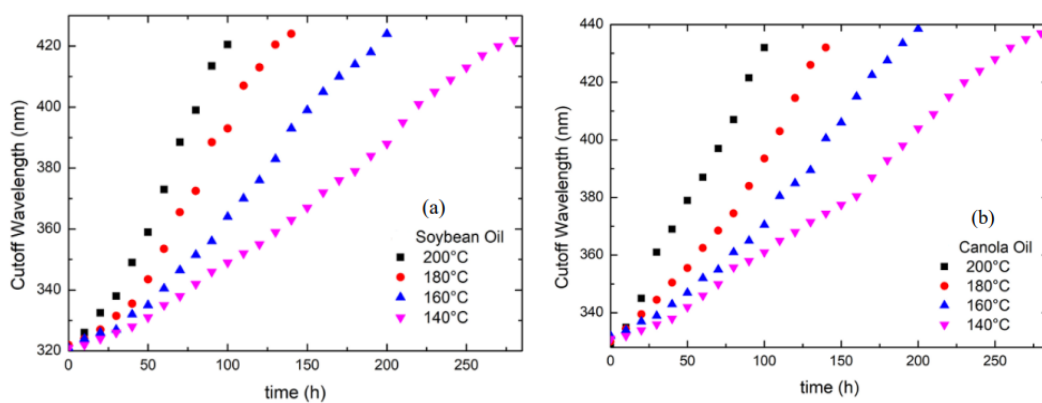

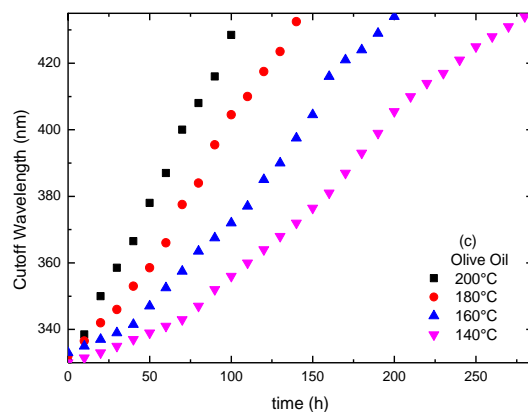

**Figure S5.** The variations of cutoff wavelength with annealing time at different annealing temperatures for (a) soybean oil, (b) canola oil, and (c) olive oil.

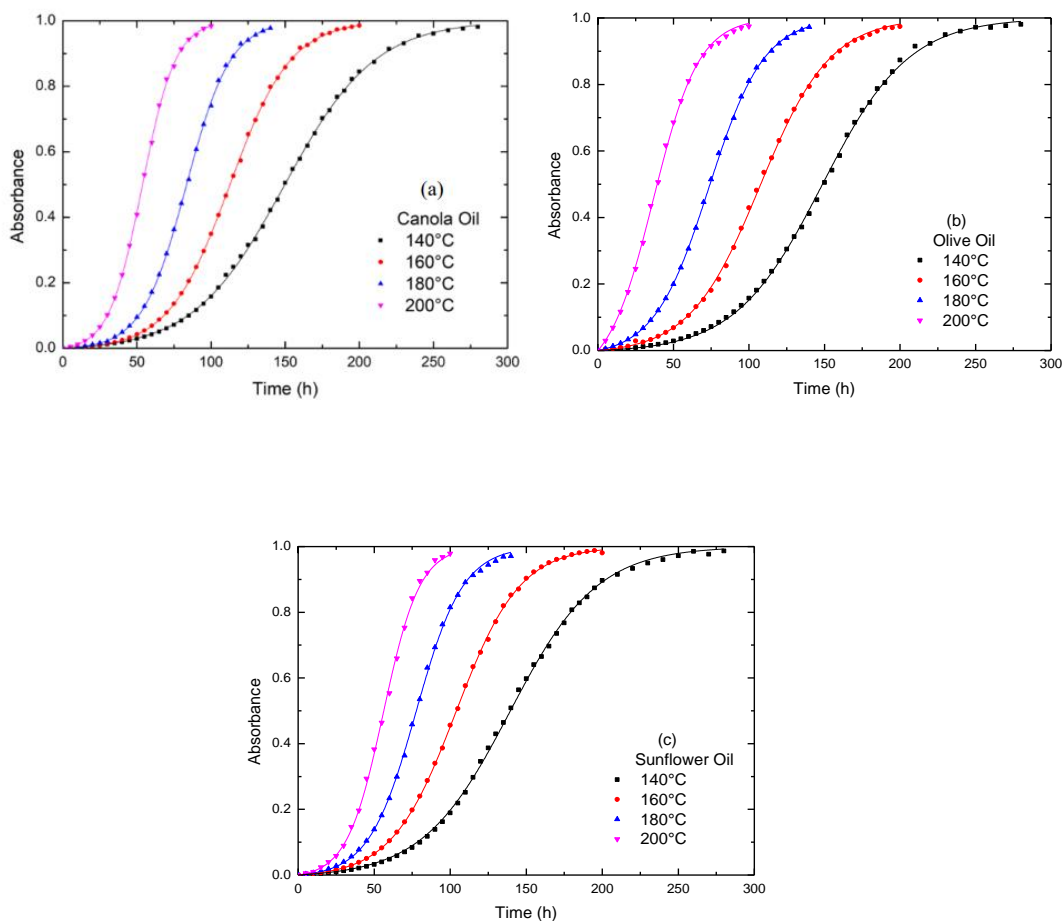

**Figure S6.** The variations of absorbance with time at different annealing temperatures: (a) soybean oil, (b) olive oil, and (c) sunflower oil.

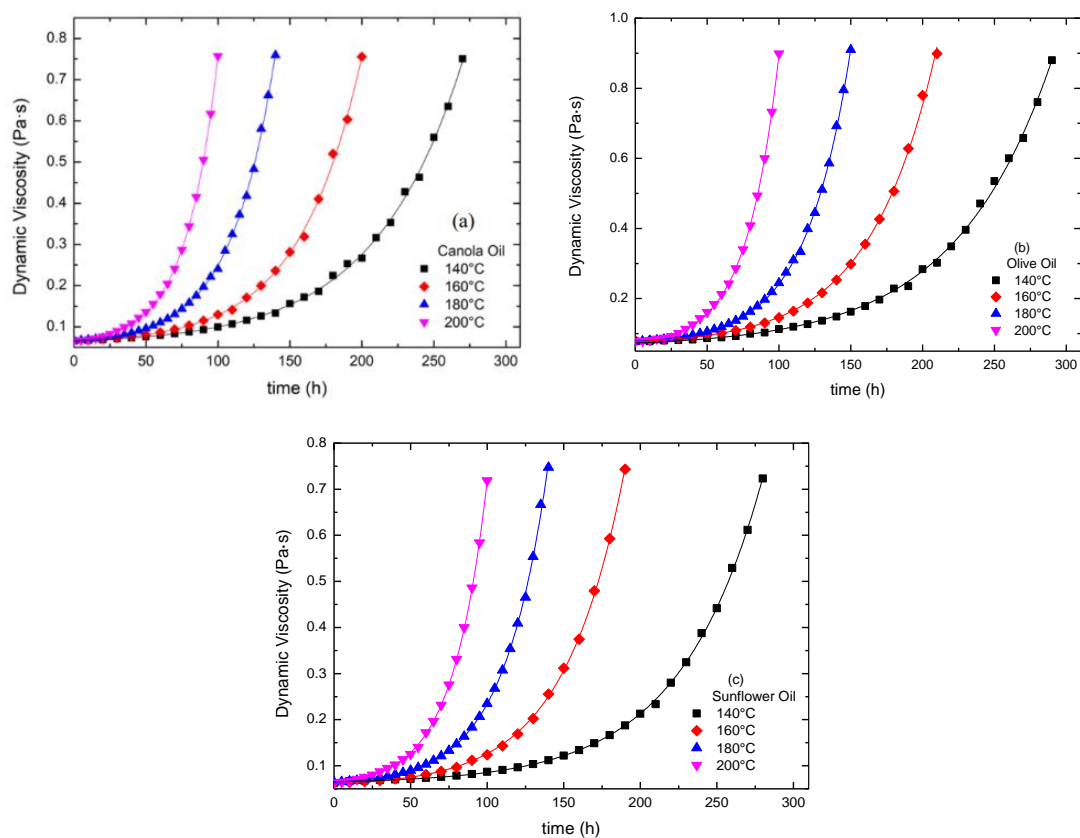

**Figure S7.** The variations of dynamic viscosity with annealing time at different annealing temperatures: (a) canola oil, (b) olive oil, and (c) sunflower oil.

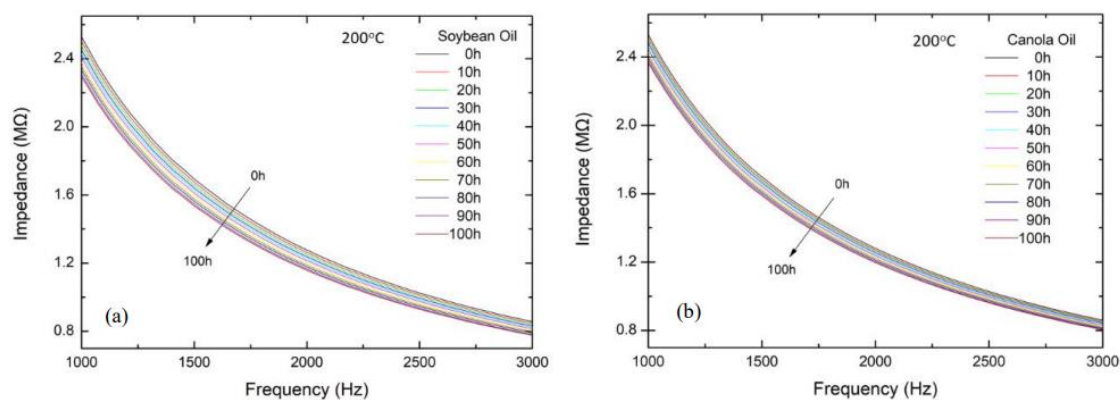

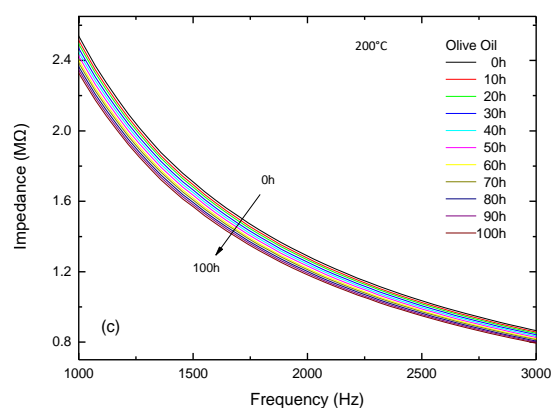

**Figure S8.** The variations of electrical impedance with the frequency for (a) soybean oil, (b) canola oil, and (c) olive oil annealed at 200°C for different annealing times.

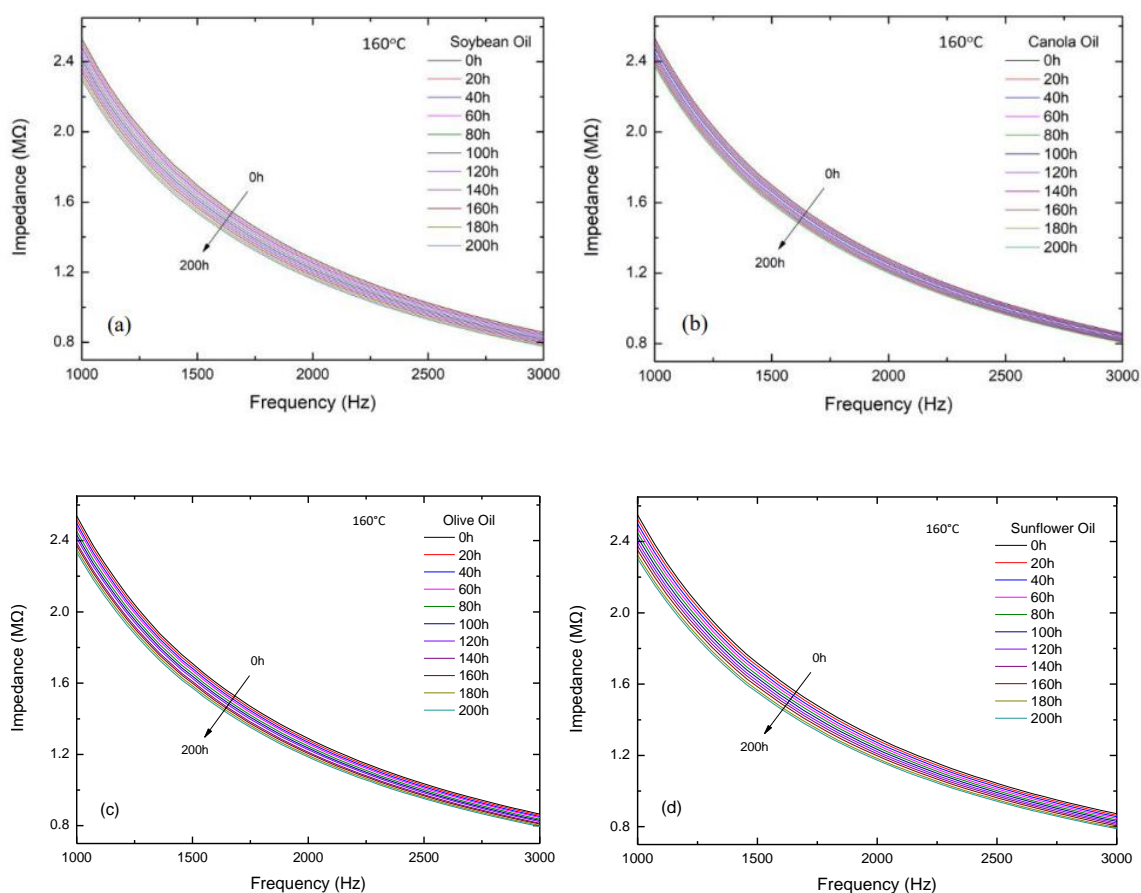

**Figure S9.** The variations of electrical impedance with the frequency for (a) soybean oil, (b) canola oil, (c) olive oil, and (d) sunflower oil annealed at 160°C for different annealing times.

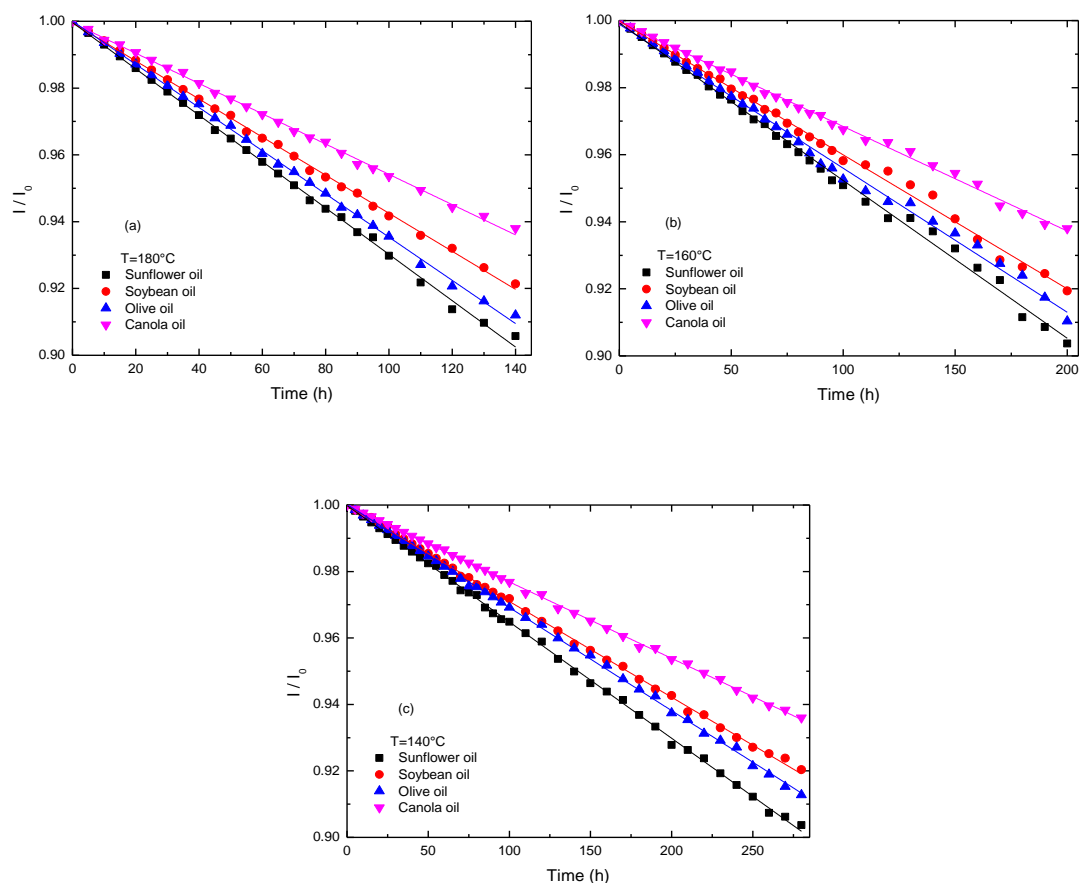

**Figure S10.** The variations of impedance with annealing time for the four types of oils at frequency 1000 Hz and annealing temperatures: (a) 180 °C, (b) 160 °C, and (c) 140 °C, respectively.

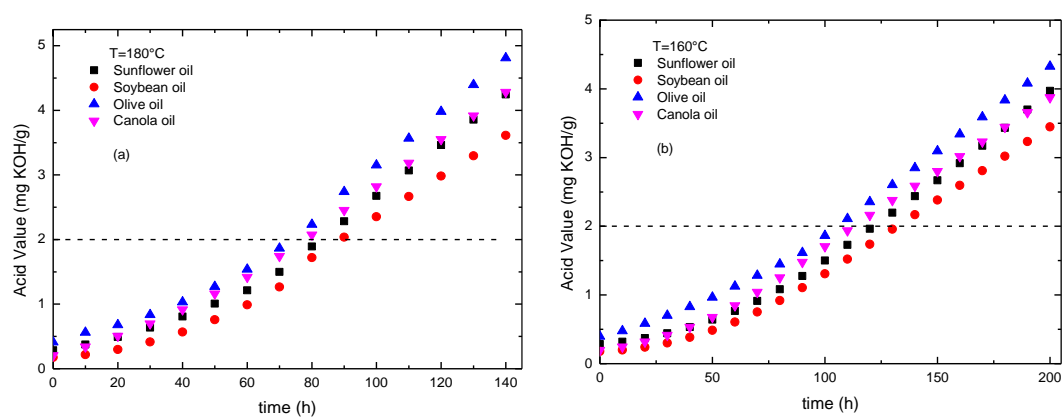



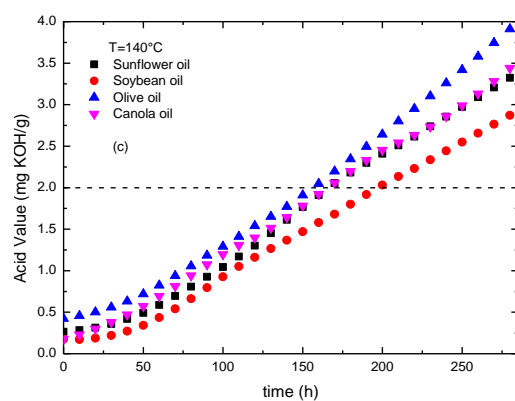

**Figure S11.** The variations of acid value with annealing time for all oils annealed at temperatures : (a) 180°C, (b) 160°C, and (c) 140°C, respectively.

### Table Captions

Table S1. Parameters  $\alpha$ ,  $A_0$ , and  $A_\infty$  to fit the absorbance data for canola oil at four annealing temperatures where  $R^2$  is the confidence interval.

Table S2. Parameters  $\alpha$ ,  $A_0$ , and  $A_\infty$  to fit the absorbance data for olive oil at four annealing temperatures where  $R^2$  is the confidence interval.

Table S3. Parameters  $\alpha$ ,  $A_0$ , and  $A_\infty$  to fit the absorbance data for sunflower oil at four annealing temperatures where  $R^2$  is the confidence interval.

Table S4. The viscosity parameters  $\phi_0$ ,  $\phi_R$ , and  $\alpha_v$  to plot the solid lines in Figure S7(a) in Supplementary Material for the canola oil.

Table S5. The parameters  $\phi_0$ ,  $\phi_R$ , and  $\alpha_v$  to plot the solid lines in Figure S7(b) in Supplementary Material for the olive oil.

Table S6. The parameters  $\phi_0$ ,  $\phi_R$ , and  $\alpha_v$  to plot the solid lines in Figure S7(c) in Supplementary Material for the sunflower oil.

Table S7. The initial impedances of four oils at a frequency of 1000 Hz annealed at different temperatures.

**Table S1.** Parameters  $\alpha$ ,  $A_0$ , and  $A_\infty$  to fit the absorbance data for canola oil at four annealing temperatures where  $R^2$  is the confidence interval.

| temperature (°C) | $\alpha$ (h <sup>-1</sup> ) | $A_0$  | $A_\infty$ | $R^2$ |
|------------------|-----------------------------|--------|------------|-------|
| 200              | 0.089                       | 0.0172 | 0.9826     | 0.996 |
| 180              | 0.067                       | 0.0177 | 0.9823     | 0.998 |
| 160              | 0.049                       | 0.0224 | 0.9776     | 0.997 |
| 140              | 0.033                       | 0.0195 | 0.9802     | 0.998 |

**Table S2.** Parameters  $\alpha$ ,  $A_0$ , and  $A_\infty$  to fit the absorbance data for olive oil at four annealing temperatures where  $R^2$  is the confidence interval.

| Temperature (°C) | $\alpha$ (h <sup>-1</sup> ) | $A_0$  | $A_\infty$ | $R^2$ |
|------------------|-----------------------------|--------|------------|-------|
| 200              | 0.070                       | 0.0115 | 0.9882     | 0.994 |
| 180              | 0.056                       | 0.0201 | 0.9797     | 0.995 |
| 160              | 0.043                       | 0.0214 | 0.9782     | 0.996 |
| 140              | 0.032                       | 0.0294 | 0.9704     | 0.997 |

**Table S3.** Parameters  $\alpha$ ,  $A_0$ , and  $A_\infty$  to fit the absorbance data for sunflower oil at four annealing temperatures where  $R^2$  is the confidence interval.

| Temperature (°C) | $\alpha$ (h <sup>-1</sup> ) | $A_0$  | $A_\infty$ | $R^2$ |
|------------------|-----------------------------|--------|------------|-------|
| 200              | 0.084                       | 0.0191 | 0.9808     | 0.997 |
| 180              | 0.065                       | 0.0245 | 0.9700     | 0.996 |
| 160              | 0.048                       | 0.0201 | 0.9797     | 0.997 |
| 140              | 0.035                       | 0.0281 | 0.9715     | 0.996 |

**Table S4.** The viscosity parameters  $\varphi_0$ ,  $\varphi_R$ , and  $\alpha_v$  to plot the solid lines in Figure S7(a) in Supplementary Material for the canola oil.

| Temperature (°C) | $\varphi_0$ ( $10^{-2}$ Pa.s) | $\varphi_R$ ( $10^{-2}$ Pa.s) | $\alpha_v$ ( $10^{-2}$ h $^{-1}$ ) | R <sup>2</sup> |
|------------------|-------------------------------|-------------------------------|------------------------------------|----------------|
| 200              | 6.605                         | 5.777                         | 4.435                              | 0.995          |
| 180              | 6.621                         | 5.912                         | 3.286                              | 0.995          |
| 160              | 6.544                         | 5.842                         | 2.299                              | 0.996          |
| 140              | 6.529                         | 5.706                         | 1.640                              | 0.998          |

**Table S5.** The parameters  $\varphi_0$ ,  $\varphi_R$ , and  $\alpha_v$  to plot the solid lines in Figure S7(b) in Supplementary Material for the olive oil.

| Temperature (°C) | $\varphi_0$ ( $10^{-2}$ Pa.s) | $\varphi_R$ ( $10^{-2}$ Pa.s) | $\alpha_v$ ( $10^{-2}$ h $^{-1}$ ) | R <sup>2</sup> |
|------------------|-------------------------------|-------------------------------|------------------------------------|----------------|
| 200              | 7.638                         | 6.636                         | 4.417                              | 0.998          |
| 180              | 7.840                         | 7.144                         | 3.197                              | 0.996          |
| 160              | 7.703                         | 6.789                         | 2.159                              | 0.998          |
| 140              | 7.309                         | 6.174                         | 1.476                              | 0.998          |

**Table S6.** The parameters  $\varphi_0$ ,  $\varphi_R$ , and  $\alpha_v$  to plot the solid lines in Figure S7(c) in Supplementary Material for the sunflower oil.

| Temperature (°C) | $\varphi_0$ ( $10^{-2}$ Pa.s) | $\varphi_R$ ( $10^{-2}$ Pa.s) | $\alpha_v$ ( $10^{-2}$ h $^{-1}$ ) | R <sup>2</sup> |
|------------------|-------------------------------|-------------------------------|------------------------------------|----------------|
| 200              | 6.312                         | 5.485                         | 4.399                              | 0.995          |
| 180              | 6.593                         | 5.489                         | 3.446                              | 0.997          |
| 160              | 6.438                         | 5.966                         | 2.620                              | 0.997          |
| 140              | 6.547                         | 6.171                         | 1.848                              | 0.996          |

**Table S7.** The initial impedances of four oils at the frequency of 1000 Hz annealed at different temperatures.

| Oil type<br>Temperature | Soybean | Canola | Olive | Sunflower |
|-------------------------|---------|--------|-------|-----------|
| 200 °C                  | 2.464   | 2.466  | 2.472 | 2.480     |
| 180 °C                  | 2.470   | 2.467  | 2.477 | 2.487     |
| 160 °C                  | 2.469   | 2.470  | 2.478 | 2.490     |
| 140 °C                  | 2.469   | 2.469  | 2.477 | 2.490     |
